# Supplementary material for: Identification of microRNAs and their target genes in the placenta as biomarkers of inflammation
Source: PubMed Central journal article supplement — Clin Exp Reprod Med. 2020 Mar 1;47(1):42–53. doi: 10.5653/cerm.2019.03013 (PMC7127901; doi:10.5653/cerm.2019.03013), 2020-03-01
Supplement: cerm-2019-03013-suppl1.pdf [file cerm-2019-03013-suppl1.pdf]

**Supplementary Table 1.** Venn diagram list in term and preterm labor

| Group                           | Down-regulated miRNA                  |             |                                 | Up-regulated miRNA |                                      |                             |
|---------------------------------|---------------------------------------|-------------|---------------------------------|--------------------|--------------------------------------|-----------------------------|
|                                 | No.                                   | LIST        | Gene Symbol                     | No.                | LIST                                 | Gene Symbol                 |
| Common                          | 1                                     | miR-1255a   | IREB2                           | 1                  | miR-557                              | CHODL                       |
|                                 | 2                                     | miR-4635    | CTPS                            | 2                  | miR-873-5p                           | TUSC3                       |
|                                 | 3                                     | miR-217     | CLCF1, NEXN                     |                    |                                      |                             |
|                                 | 4                                     | miR-224-5p  | PTX3                            |                    |                                      |                             |
|                                 | 5                                     | miR-326     | GGT5                            |                    |                                      |                             |
|                                 | 6                                     | miR-374a-5p | VEGFA                           |                    |                                      |                             |
|                                 | 7                                     | miR-520b    | SASH1                           |                    |                                      |                             |
|                                 | 8                                     | miR-548i    | NOTUM                           |                    |                                      |                             |
|                                 | 9                                     | miR-224-5p  | NOTUM                           |                    |                                      |                             |
|                                 | 10                                    | miR-576-5p  | SLC39A14                        |                    |                                      |                             |
| Term with inflammation          | 1                                     | miR-3148    | CDH13                           | 1                  | miR-3199                             | LRP8                        |
|                                 | 2                                     | miR-4303    | UBASH3B                         | 2                  | miR-137                              | PDLIM3                      |
|                                 | 3                                     | miR-1       | TMEM178                         | 3                  | miR-144-3p                           | PKNOX1                      |
|                                 | 4                                     | miR-1182    | EBF3                            | 4                  | miR-505-3p                           | FAM76B                      |
|                                 | 5                                     | miR-193a-3p | DCAF7                           | 5                  | miR-2115-5p                          | SYNPR                       |
|                                 | 6                                     | miR-371a-5p | LEF1                            | 6                  | miR-301a-3p                          | ARHGEF4, MBD2               |
|                                 | 7                                     | miR-373-3p  | CD44                            | 7                  | miR-137                              | MBD2                        |
|                                 | 8                                     | miR-375     | SLC31A1                         | 8                  | miR-3666                             | MBD2                        |
|                                 | 9                                     | miR-708-5p  | SLC31A1                         | 9                  | miR-3065-3p                          | LOX                         |
|                                 | 10                                    | miR-4646-5p | COPG2                           | 10                 | miR-3065-5p                          | MBD2                        |
|                                 | 11                                    | miR-4792    | SLCO2B1                         | 11                 | miR-34c-5p                           | HSPA1A, HSPA1A /// HSPA1B   |
|                                 | 12                                    | miR-4793-3p | TLR4                            | 12                 | miR-3614-5p                          | PNN                         |
|                                 | 13                                    | miR-509-5p  | AFF3                            | 13                 | miR-4458                             | COL1A2                      |
|                                 | 14                                    | miR-544b    | SLC7A4                          | 14                 | miR-4642                             | FLT1                        |
|                                 | 15                                    | miR-708-5p  | NNAT                            | 15                 | miR-4716-5p                          | HEXA, C21orf7               |
| Preterm labor with inflammation |                                       |             |                                 | 16                 | miR-4771                             | SIM2                        |
|                                 |                                       |             |                                 | 17                 | miR-497-5p                           | PLEKHA5                     |
|                                 |                                       |             |                                 | 18                 | miR-15a-5p                           | PLEKHA5                     |
|                                 |                                       |             |                                 | 19                 | miR-92b-3p                           | RNF141, MAP1B               |
|                                 | 1                                     | miR-217     | CLCF1, NEXN                     | 1                  | miR-3138                             | GLG1                        |
|                                 | 2                                     | miR-224-5p  | PTX3                            | 2                  | miR-3661                             | RUNX1T1                     |
|                                 | 3                                     | miR-326     | GGT5                            | 3                  | miR-514b-5p                          | ZNF711                      |
|                                 | 4                                     | miR-374a-5p | VEGFA                           | 4                  | miR-1276                             | PPP2R5C                     |
|                                 | 5                                     | miR-520b    | SASH1                           | 5                  | miR-1321                             | ADAM11                      |
|                                 | 6                                     | miR-548i    | NOTUM                           | 6                  | miR-138-5p                           | ZFAT, ZC3H6                 |
|                                 | 7                                     | miR-224-5p  | NOTUM                           | 7                  | miR-193a-3p                          | ANKRD13A                    |
|                                 | 8                                     | miR-576-5p  | SLC39A14                        | 5                  | miR-3128                             | MEX3A, NF1                  |
|                                 | 9                                     | miR-101-3p  | TNKS2                           | 9                  | miR-2278                             | NF1                         |
|                                 | 10                                    | miR-1299    | PTPLA, MAP1B, C2orf7, KLF15     | 10                 | miR-3156-3p                          | ELF2                        |
|                                 | 11                                    | miR-376a-3p | KLF15                           | 11                 | miR-3161                             | PHF20L1                     |
|                                 | 12                                    | miR-199b-5p | MAP4                            | 12                 | miR-3176                             | PPP1R12A                    |
|                                 | 13                                    | miR-3158-5p | NAGS                            | 13                 | miR-3179                             | PPP1R12A                    |
|                                 | 14                                    | miR-3613-3p | NFASC                           | 14                 | miR-3177-5p                          | PCDH18, PPP1R3B             |
|                                 | 15                                    | miR-374b-5p | NCOA1                           | 15                 | miR-3185                             | POU2F3                      |
|                                 | 16                                    | miR-23c     | NCOA1                           | 16                 | miR-371b-5p                          | EXOC4, SAMD5                |
|                                 | 17                                    | miR-424-8p  | WIPI2, SLC11A2                  | 17                 | miR-3925-3p                          | SYNJ1, FBXO3                |
|                                 | 18                                    | miR-4430    | NGFR, WFDC2, DDAH1              | 18                 | miR-4461                             | FBXO3                       |
|                                 | 19                                    | miR-4492    | WFDC2                           | 19                 | miR-4287                             | TOP1                        |
|                                 | 20                                    | miR-96-5p   | DDAH1                           | 20                 | miR-4419b                            | RAB27A, VTA1                |
|                                 | 21                                    | miR-4510    | ARPC1A /// ARPC1B /// LOC653888 | 21                 | miR-4461                             | DMD                         |
|                                 | 22                                    | miR-4640-5p | CD248, PAQR7                    | 22                 | miR-449a                             | KIAA1462                    |
|                                 | 23                                    | miR-4645-5p | LMAN2L                          | 23                 | miR-4672                             | C5orf13                     |
|                                 | 24                                    | miR-4667-3p | FKBP5                           | 24                 | miR-4695-3p                          | SDC2                        |
|                                 | 25                                    | miR-4487    | FKBP5                           | 25                 | miR-4708-3p                          | FRMD4B, VTA1, OPRK1, ZAK    |
|                                 | 26                                    | miR-4680-5p | VAPA, CD163                     | 26                 | miR-4741                             | NCOR1                       |
|                                 | 27                                    | miR-4709-3p | C1QB                            | 27                 | miR-4793-3p                          | ORMDL1                      |
|                                 | 28                                    | miR-4769-5p | FAM126B                         | 28                 | miR-548c-5p                          | TCF12                       |
|                                 | 29                                    | miR-515-5p  | CP110                           | 29                 | miR-548c-5p                          | TCF12, GPR155, EPHA3, NFAT5 |
| 30                              | miR-518f-3p                           | ZNF282      | 30                              | miR-3179           | GPR155                               |                             |
| 31                              | miR-519a-3p, miR-519b-3p, miR-519c-3p | ITGB4       | 31                              | miR-559            | EPHA3, FAM115A, NFAT5, SETD2         |                             |
| 32                              | miR-7-5p                              | ITPKC       | 32                              | miR-4419b          | FAM115A                              |                             |
| 33                              | miR-96-5p                             | HTRA4       | 33                              | miR-607            | SCCPDH, MAMDC2, BAT2L2, CTBS, SYNPO2 |                             |
