# Supplementary material for: Identification of microRNAs and their target genes in the placenta as biomarkers of inflammation
Source: PubMed Central journal article supplement — Clin Exp Reprod Med. 2020 Mar 1;47(1):42–53. doi: 10.5653/cerm.2019.03013 (PMC7127901; doi:10.5653/cerm.2019.03013), 2020-03-01
Supplement: cerm-2019-03013-suppl2.pdf [file cerm-2019-03013-suppl2.pdf]

**Supplementary Table 2.** Venn diagram list in preterm labor

| Group                              | Down-regulated miRNA |                                       |                                           | Up-regulated miRNA |             |                                                  |
|------------------------------------|----------------------|---------------------------------------|-------------------------------------------|--------------------|-------------|--------------------------------------------------|
|                                    | No.                  | LIST                                  | Gene Symbol                               | No.                | LIST        | Gene Symbol                                      |
| Common                             | 1                    | miR-4526                              | PTX3                                      | 1                  | miR-557     | CHODL                                            |
|                                    | 2                    | miR-4477a                             | NDST2                                     | 2                  | miR-200a-3p | MYBL1                                            |
|                                    | 3                    | miR-548i                              | SPTBN1                                    | 3                  | miR-373-3p  | RDX                                              |
| Preterm labor without inflammation | 4                    |                                       |                                           | 4                  | miR-708-5p  | MCM9                                             |
|                                    | 1                    | miR-4259                              | CYTH2                                     | 1                  | miR-1       | VAMP4, MXD1, FNDC3A                              |
|                                    | 2                    | miR-188-3p                            | INPP5A                                    | 2                  | miR-483-3p  | ACER3                                            |
|                                    | 3                    | miR-548l                              | DCUN1D4                                   | 3                  | miR-483-3p  | ACER3, RNASE11, ZBTB38                           |
|                                    | 4                    | miR-3160-3p                           | KATNAL1, PDE8B                            | 4                  | miR-4698    | NRIP1, GCA                                       |
|                                    | 5                    | miR-130b-3p                           | UBE3B, SEL1L3                             | 5                  | miR-4736    | NRIP1                                            |
|                                    | 6                    | miR-4295                              | UBE3B, SEL1L3                             | 6                  | miR-769-3p  | CCNG2                                            |
|                                    | 7                    | miR-4297                              | GABBR1 /// UBD                            | 7                  | miR-548ae   | MICAL3                                           |
|                                    | 8                    | miR-622                               | PPARD                                     | 8                  | miR-548ac   | TNFAIP2                                          |
|                                    | 9                    | miR-4469                              | CLDN12 /// GTPBP10                        | 9                  | miR-223-3p  | PKNOX1                                           |
|                                    | 10                   | miR-4494                              | ARAP3                                     | 10                 | miR-204-5p  | LOC221710, C2CD2                                 |
|                                    | 11                   | miR-202-3p                            | CREM                                      | 11                 | miR-4796-3p | UVRAG, RYBP                                      |
|                                    | 12                   | miR-548ak                             | LEF1                                      | 12                 | miR-3163    | CACNA1G                                          |
|                                    | 13                   | miR-2355-3p                           | ZSWIM4                                    | 13                 | miR-4786-5p | ABCG1                                            |
|                                    | 14                   | miR-3157-5p                           | TTC23                                     | 14                 | miR-760     | HIST1H2BI                                        |
|                                    | 15                   | miR-3646                              | FILIP1L                                   | 15                 | miR-612     | RYBP                                             |
| 16                                 | miR-3124-3p          | ATF2                                  | 16                                        | miR-4736           | ZNF608      |                                                  |
| Preterm labor with inflammation    | 17                   |                                       |                                           | 17                 | miR-3187-3p | ASAP3                                            |
|                                    | 1                    | miR-4763-5p                           | TXNRD1                                    | 1                  | miR-659-3p  | INSIG1, NLK, RAB27A, ZNF507, MAP7                |
|                                    | 2                    | miR-23c                               | TXNRD1, NCOA1, WBP2                       | 2                  | miR-466     | SCD5, ANKRD11, PCDH18, NR3C1                     |
|                                    | 3                    | miR-3613-3p                           | ACTN4, ELAVL1, NFASC                      | 3                  | miR-607     | SYNPO2, HPSE, BAT2L2, CTBS, SCCPDH, HPSE, MAMDC2 |
|                                    | 4                    | miR-199b-5p                           | MAP4, FLRT3                               | 4                  | miR-548c-5p | TCF12, NFAT5, TMEM133, EPHA3, TCF12, GPR155      |
|                                    | 5                    | miR-186-5p                            | MAP4, NOG, VEGFA                          | 5                  | miR-193a-3p | ANKRD13A, ALS2CR8                                |
|                                    | 6                    | miR-4769-5p                           | ELAVL1, FAM126B                           | 6                  | miR-4651    | ECM1                                             |
|                                    | 7                    | miR-4430                              | WFDC2, NGFR, DDAH1                        | 7                  | miR-4483    | NKTR                                             |
|                                    | 8                    | miR-4492                              | WFDC2, WARS                               | 8                  | miR-4695-3p | FAM47E /// STBD1, SDC2                           |
|                                    | 9                    | miR-4510                              | EIF4EBP1, ARPC1A /// ARPC1B /// LOC653888 | 9                  | miR-4708-3p | ZAK, FRMD4B, OPRK1                               |
|                                    | 10                   | miR-4713-5p                           | SPOCK1                                    | 10                 | miR-212-3p  | FAM91A1 /// FAM91A2                              |
|                                    | 11                   | miR-7-5p                              | ITPKC                                     | 11                 | miR-3187-5p | TCF12, CCDC76, CCDC76                            |
|                                    | 12                   | miR-1299                              | C1QTNF1, PTPLA, MAP1B                     | 12                 | miR-641     | FGF13, ATP6AP2, OPRK1                            |
|                                    | 13                   | miR-424-5p                            | C1orf21, CCNE1, WIPI2, VEGFA              | 13                 | miR-3138    | VLDLR, GLG1                                      |
|                                    | 14                   | miR-4640-5p                           | CD248, PAQR7, PHKG2                       | 14                 | miR-4438    | RNGTT, SYTL2, PDZD2                              |
|                                    | 15                   | miR-374a-5p, miR-374b-5p              | NCOA1, WNT5A, VEGFA                       | 15                 | miR-4733-3p | PDZD2                                            |
|                                    | 16                   | miR-374c-5p                           | VEGFA, CLCF1                              | 16                 | miR-3925-5p | SYNJ1, NR1D2, ZNF468, FBXO3                      |
|                                    | 17                   | miR-520b, miR-520c-3p                 | GALNT3                                    | 17                 | miR-4287    | STK17A                                           |
|                                    | 18                   | miR-520h                              | SORL1, VCL                                | 18                 | miR-4519    | HPSE                                             |
|                                    | 19                   | miR-101-3p                            | TNKS2, FLRT3                              | 19                 | miR-4419b   | RAB27A, FAM115A, VTA1                            |
|                                    | 20                   | miR-224-5p                            | NOTUM                                     | 20                 | miR-371a-5p | RNF141, CELF2, EXOC4                             |
|                                    | 21                   | miR-326                               | RIT1, PARVA                               | 21                 | miR-873-5p  | AFAP1L2, CELF2, TUSC3                            |
|                                    | 22                   | miR-4680-5p                           | VAPA, CD163, NOG                          | 22                 | miR-3176    | LPHN3, PPP1R12A                                  |
|                                    | 23                   | miR-515-5p                            | CLCF1, CA4, CP110                         | 23                 | miR-3161    | PHF20L1, RICTOR                                  |
|                                    | 24                   | miR-217                               | CLCF1                                     | 24                 | miR-1321    | ADAM11                                           |
|                                    | 25                   | miR-519a-3p, miR-519b-3p, miR-519c-3p | ITGB4                                     | 25                 | miR-514b-5p | CELF2, HP1BP3, PPP1R3C                           |
|                                    | 26                   | miR-3158-5p                           | NAGS, GCNT1                               | 26                 | miR-3177-5  | PCDH18                                           |
|                                    | 27                   | miR-204-5p                            | ALPL                                      | 27                 | miR-1276    | ALS2CR8, PPP2R5C                                 |
|                                    | 28                   | miR-3921                              | IL27RA, CERCAM                            | 28                 | miR-3920    | ALS2CR8                                          |
|                                    | 29                   | miR-4667-3p                           | FAM110B                                   | 29                 | miR-4461    | DMD, FBXO3                                       |
|                                    | 30                   | miR-4667-5p                           | FBLN1                                     | 30                 | miR-129-5p  | GALNT1, TNPO1, TRIO, NRN1                        |
|                                    | 31                   | miR-4487                              | SLC6A8, FLT1                              | 31                 | miR-4690-3p | MAP7                                             |
|                                    | 32                   | miR-4324                              | IGDCC3                                    | 32                 | miR-940     | PVRL4                                            |
|                                    | 33                   | miR-1184                              | DSEL                                      | 33                 | miR-4741    | NCOR1                                            |
|                                    | 34                   | miR-301b                              | DSEL                                      | 34                 | miR-3675-3p | ADM                                              |
|                                    | 35                   | miR-548a-3p                           | TCF20, IREB2                              | 35                 | miR-3185    | POU2F3                                           |
|                                    | 36                   | miR-218-5p                            | EGLN3, GALNT3                             | 36                 | miR-3128    | MEX3A, NF1                                       |
|                                    | 37                   | miR-1254                              | PAQR7                                     | 37                 | miR-371b-5p | EXOC4                                            |
| 38                                 | miR-3194-3p          | NOG, GCNT1                            | 38                                        | miR-371b-5p        | GLG1        |                                                  |

(Continued to the next page)

**Supplementary Table 2.** Continued

| Group | Down-regulated miRNA |                      |                     | Up-regulated miRNA |          |             |
|-------|----------------------|----------------------|---------------------|--------------------|----------|-------------|
|       | No.                  | LIST                 | Gene Symbol         | No.                | LIST     | Gene Symbol |
|       | 39                   | miR-96-5p            | GCNT1, HTRA4, DDAH1 | 39                 | miR-3128 | C15orf29    |
|       | 40                   | miR-576-5p           | SLC39A14            |                    |          |             |
|       | 41                   | miR-4735-5p          | SLC39A14            |                    |          |             |
|       | 42                   | miR-2116-5p          | FLRT3               |                    |          |             |
|       | 43                   | miR-542-3p           | FLRT3               |                    |          |             |
|       | 44                   | let-7f-5p, let-7g-5p | MSR1                |                    |          |             |
|       | 45                   | miR-340-5p           | NOG, ACPL2          |                    |          |             |
|       | 46                   | miR-29c-3p           | VEGFA, ACPL2, IREB2 |                    |          |             |
|       | 47                   | miR-590-5p           | RMNDS5, VCL         |                    |          |             |
|       | 48                   | miR-885-3p           | OTUD5               |                    |          |             |
|       | 49                   | miR-1269b            | MXRA7               |                    |          |             |
|       | 50                   | miR-4474-3p          | MXRA7               |                    |          |             |
|       | 51                   | miR-323a-3p          | FLT1                |                    |          |             |
|       | 52                   | miR-137              | SLC4A7              |                    |          |             |
|       | 53                   | miR-5047             | PHACTR3             |                    |          |             |
|       | 54                   | miR-518f-3p          | ZNF282              |                    |          |             |
|       | 55                   | miR-21-5p            | VCL                 |                    |          |             |
|       | 56                   | miR-4685-3p          | FAM134B             |                    |          |             |
|       | 57                   | miR-4645-5p          | LMAN2L              |                    |          |             |
|       | 58                   | miR-424-5p           | OSCP1, SLC11A2      |                    |          |             |
|       | 59                   | miR-26b-5p           | MRAS                |                    |          |             |

miRNA, microRNA.
